# Supplementary material
Source: publisher figshare collection journal article supplement (https://acs.figshare.com/ndownloader/files/4417654)

## Supporting information

### Ion Mobility Mass Spectrometry of $\text{Au}_{25}(\text{SCH}_2\text{CH}_2\text{Ph})_{18}$ Nanoclusters

Laurence A. Angel,<sup>\*,†</sup> Lance T. Majors,<sup>‡</sup> Asantha C. Dharmaratne,<sup>‡</sup> Amala Dass<sup>\*,‡</sup>  
E-mail: laurence\_angel@tamu-commerce.edu; amal@olemiss.edu

<sup>†</sup> Department of Chemistry, Texas A&M-Commerce

<sup>‡</sup> Department of Chemistry and Biochemistry, University of Mississippi

Figure S1. Mass spectra of  $\text{Au}_{25}$  (a) positive scan (b) negative scan

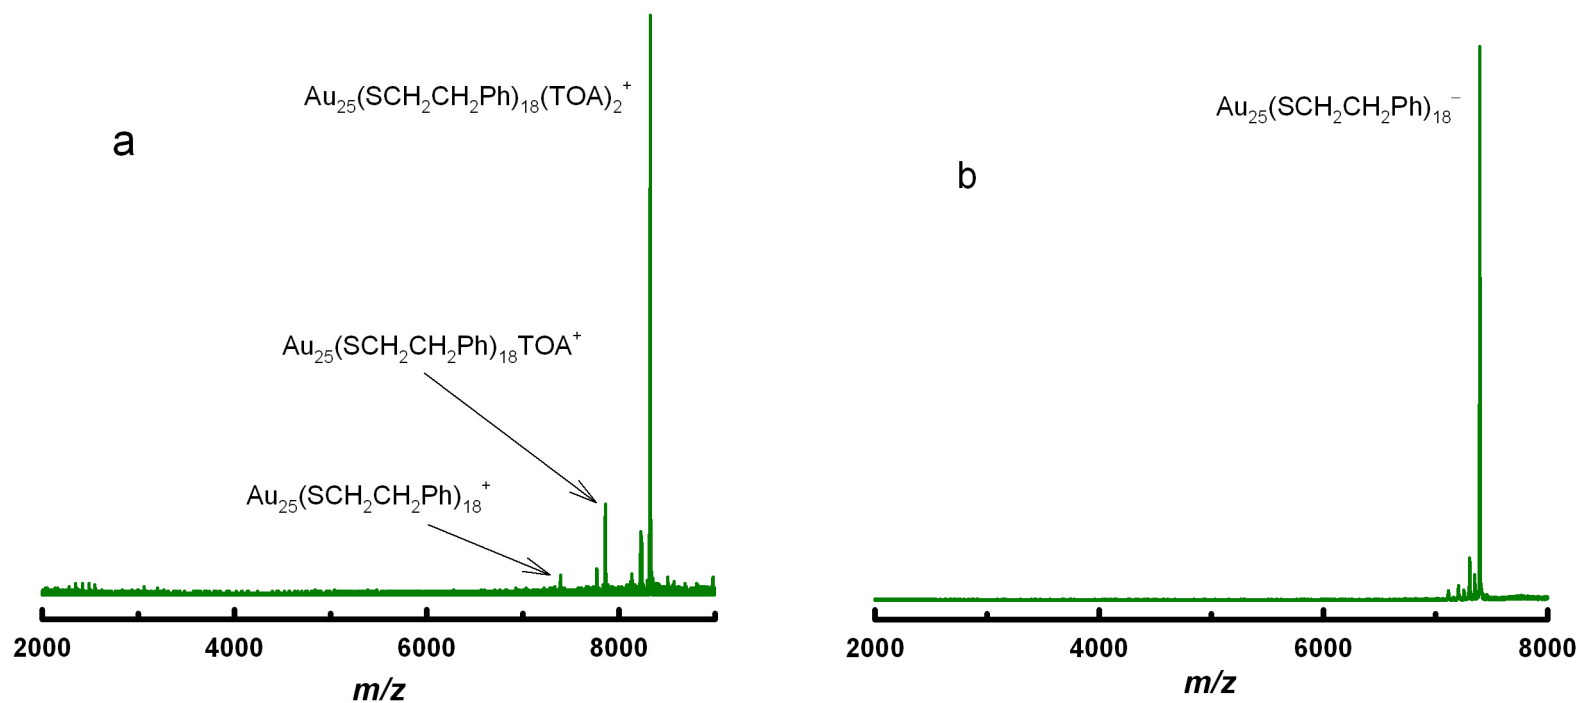

Figure S2: Expanded version of Figure 1. IM-MS/MS of  $\text{Au}_{25}(\text{SCH}_2\text{CH}_2\text{Ph})_{18}^-$  taken by resolving the  $\text{Au}_{25}(\text{SCH}_2\text{CH}_2\text{Ph})_{18}^-$  parent ion and applying 100 V lab kinetic energy to the trap T-wave cell.

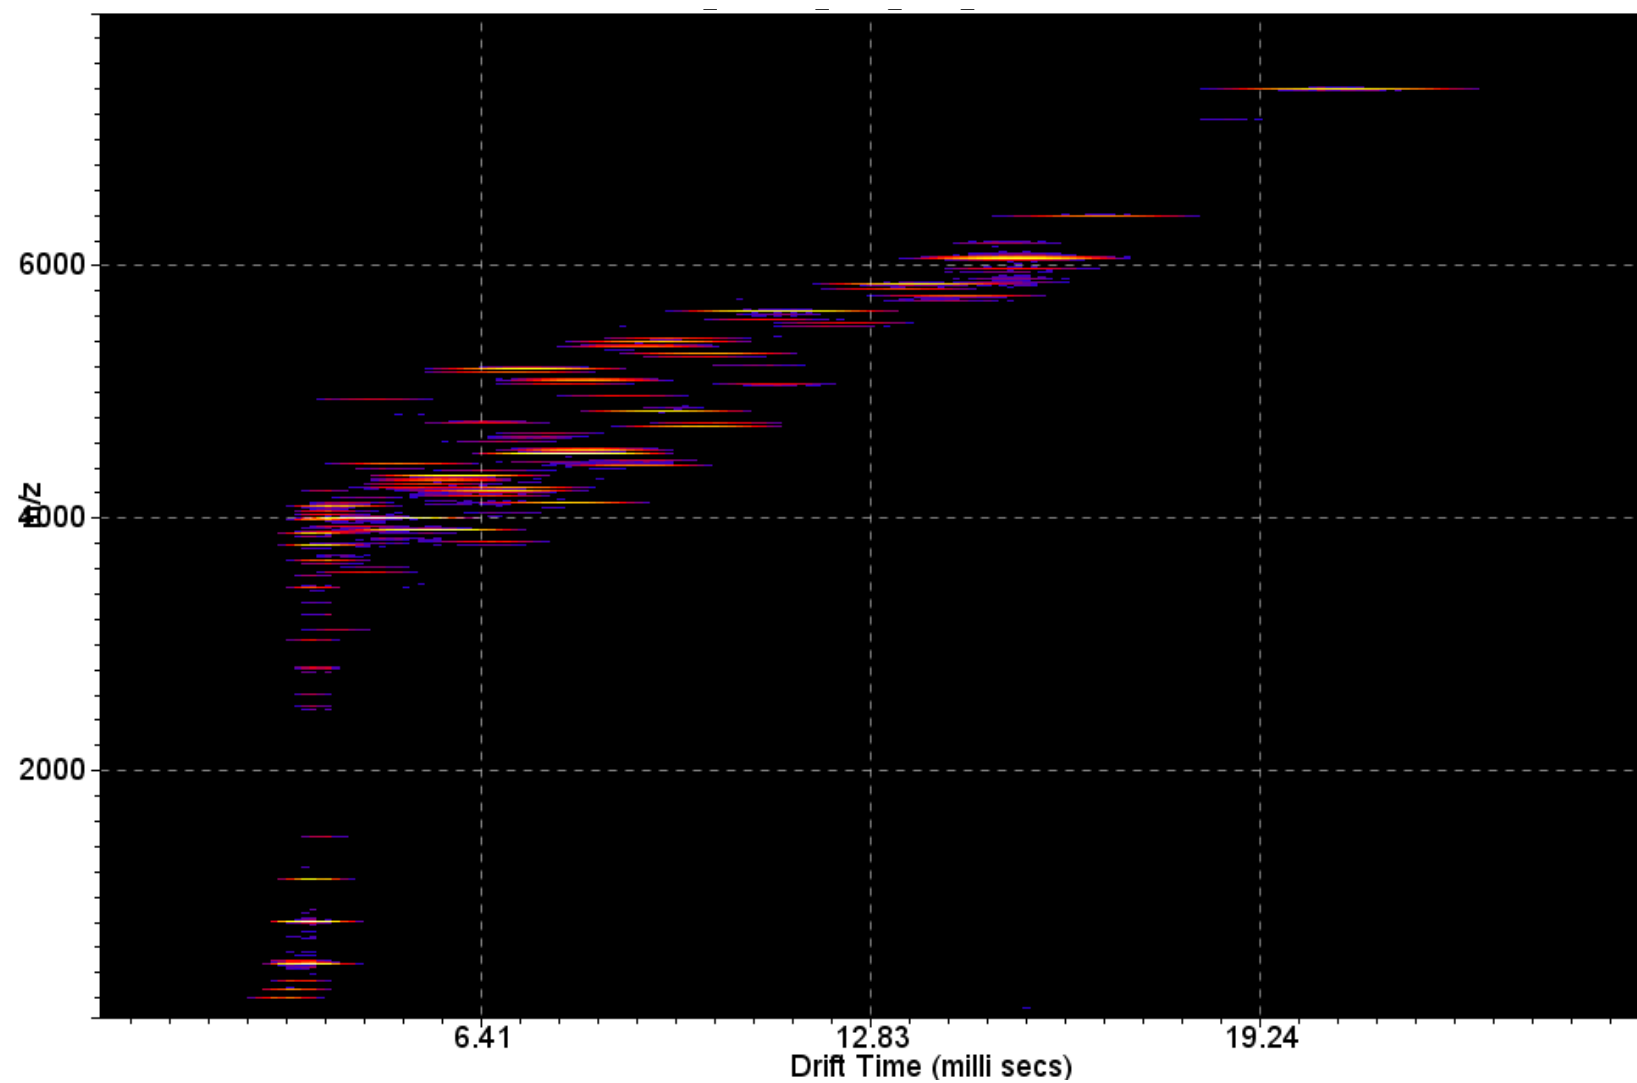

Figure S3: Expanded and full mass range version of Figure 2. IM-MS/MS of  $\text{Au}_{25}(\text{SCH}_2\text{CH}_2\text{Ph})_{18}^-$  taken without resolving the  $\text{Au}_{25}(\text{SCH}_2\text{CH}_2\text{Ph})_{18}^-$  parent ion and applying 200 V lab kinetic energy to the trap T-wave cell.

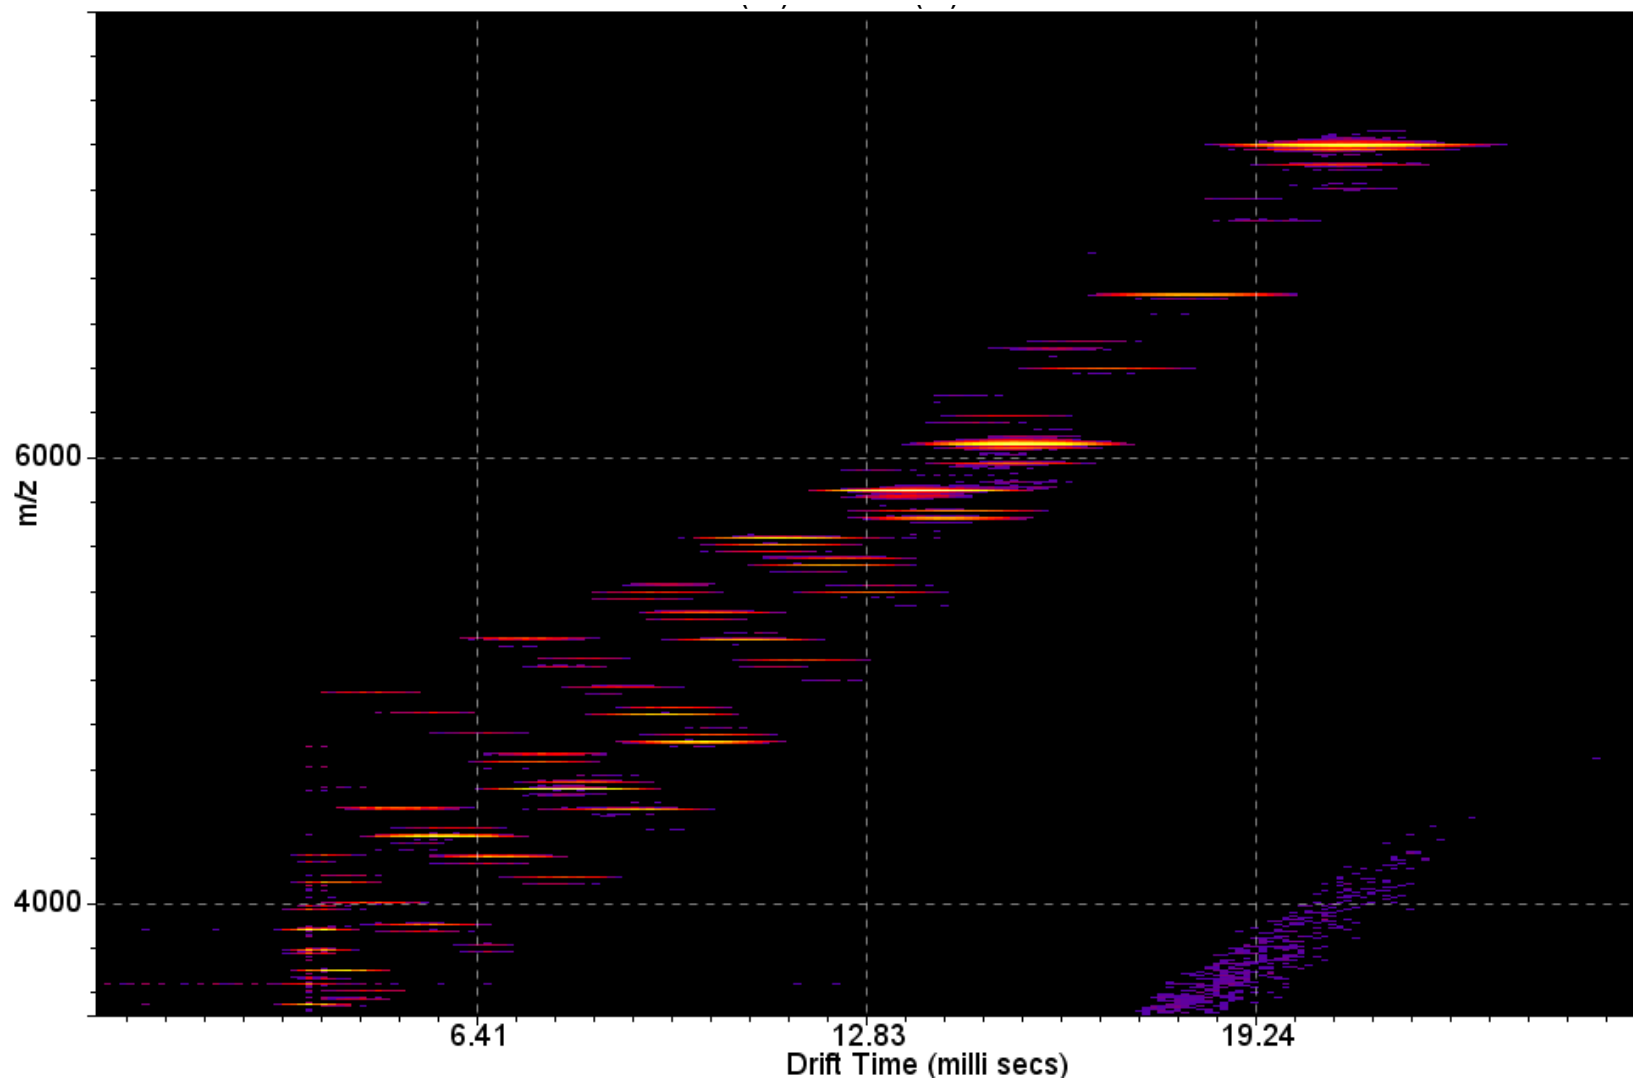

Figure S4: Expanded version of Figure 3

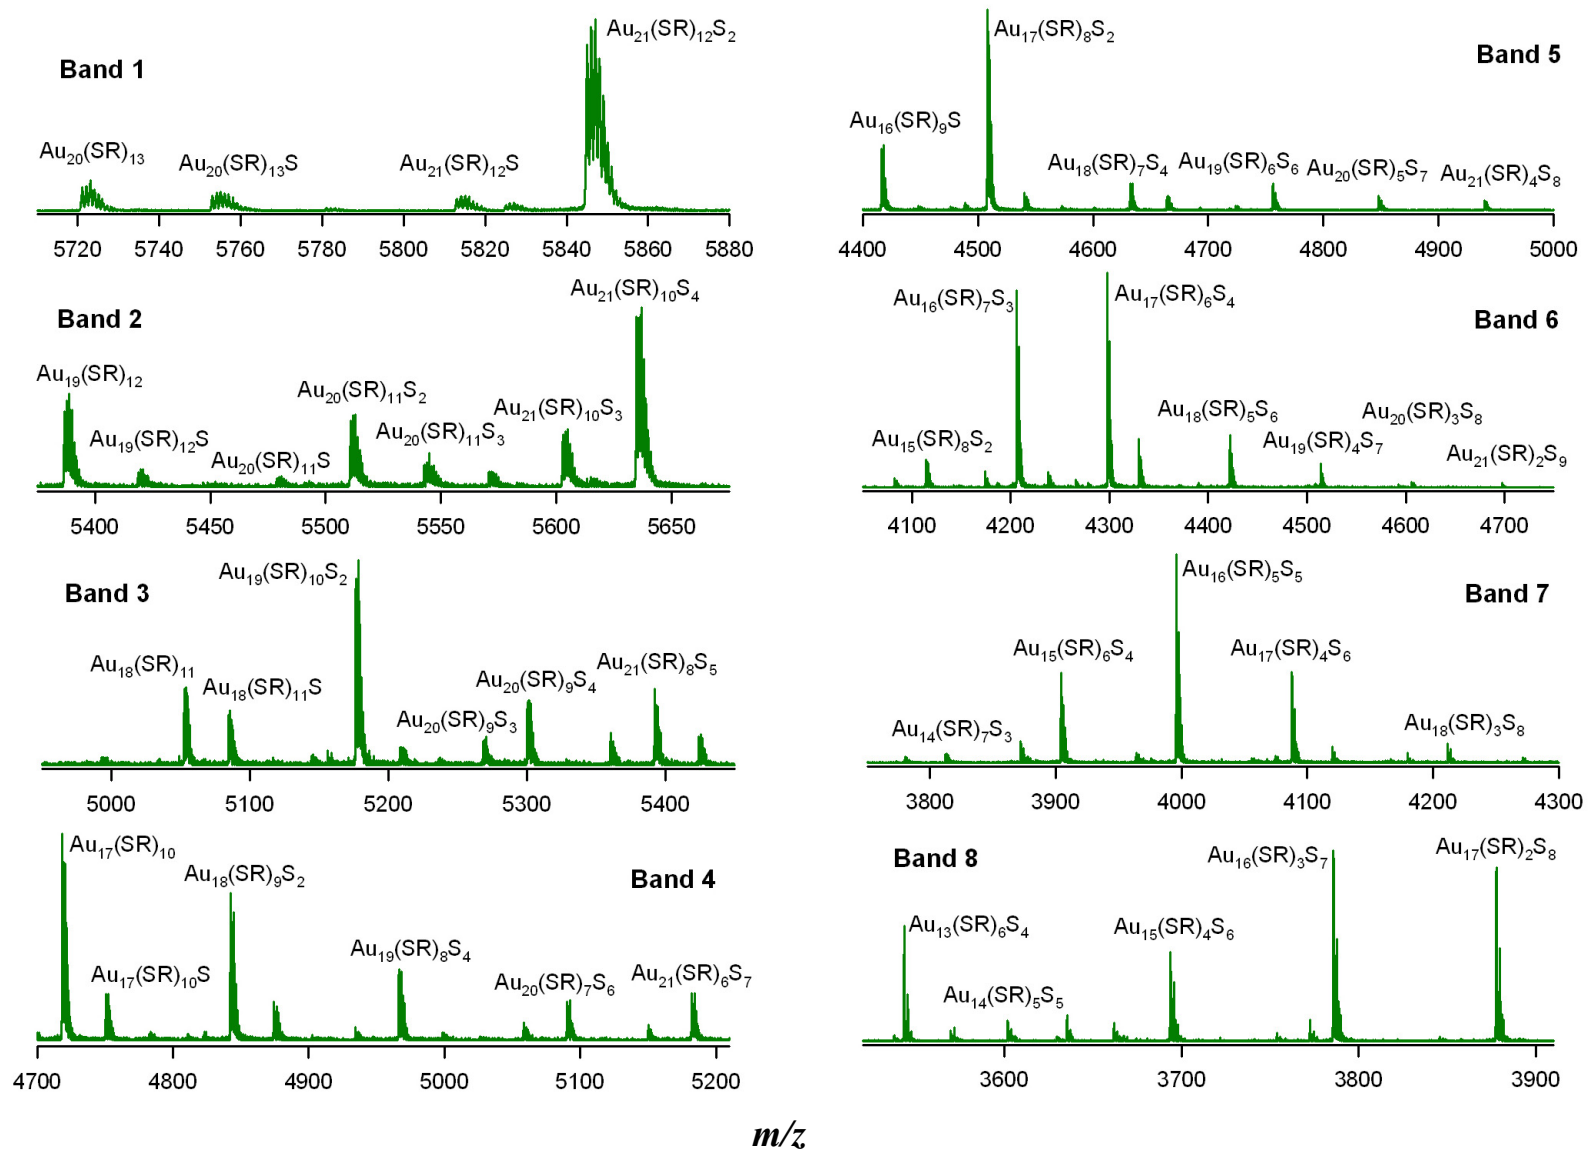

| Band | High mass species                            | Low mass species                          | $\Delta -\text{Au}, -\text{S}, +\text{R}$    | $\Delta$ mass across band, amu |
|------|----------------------------------------------|-------------------------------------------|----------------------------------------------|--------------------------------|
| 1    | $\text{Au}_{21}(\text{SR})_{12}\text{S}_2^-$ | $\text{Au}_{20}(\text{SR})_{13}^-$        | $\Delta -1\text{Au}, -1\text{S}, +1\text{R}$ | $\Delta -124$                  |
| 2    | $\text{Au}_{21}(\text{SR})_{10}\text{S}_4^-$ | $\text{Au}_{19}(\text{SR})_{12}^-$        | $\Delta -2\text{Au}, -2\text{S}, +2\text{R}$ | $\Delta -248$                  |
| 3    | $\text{Au}_{21}(\text{SR})_8\text{S}_6^-$    | $\text{Au}_{18}(\text{SR})_{11}^-$        | $\Delta -3\text{Au}, -3\text{S}, +3\text{R}$ | $\Delta -372$                  |
| 4    | $\text{Au}_{21}(\text{SR})_6\text{S}_7^-$    | $\text{Au}_{17}(\text{SR})_{10}^-$        | $\Delta -4\text{Au}, -3\text{S}, +4\text{R}$ | $\Delta -464$                  |
| 5    | $\text{Au}_{21}(\text{SR})_4\text{S}_8^-$    | $\text{Au}_{16}(\text{SR})_9\text{S}^-$   | $\Delta -5\text{Au}, -2\text{S}, +5\text{R}$ | $\Delta -524$                  |
| 6    | $\text{Au}_{21}(\text{SR})_2\text{S}_9^-$    | $\text{Au}_{15}(\text{SR})_8\text{S}^-$   | $\Delta -6\text{Au}, -2\text{S}, +6\text{R}$ | $\Delta -616$                  |
| 7    | $\text{Au}_{18}(\text{SR})_3\text{S}_8^-$    | $\text{Au}_{14}(\text{SR})_7\text{S}^-$   | $\Delta -4\text{Au}, -3\text{S}, +4\text{R}$ | $\Delta -464$                  |
| 8    | $\text{Au}_{17}(\text{SR})_2\text{S}_8^-$    | $\text{Au}_{13}(\text{SR})_6\text{S}_4^-$ | $\Delta -4\text{Au}, -0\text{S}, +4\text{R}$ | $\Delta -368$                  |

**Table S1.** Assignments of the high and low mass species contained in the individual bands 1 to 8 and the changes in mass that accompanies them, where R = CH<sub>2</sub>CH<sub>2</sub>Ph.

Consecutive bands display an increased incremental loss of Au atoms and increased incremental gain of -CH<sub>2</sub>CH<sub>2</sub>Ph. For example in band 2, the high and low mass species are  $\text{Au}_{21}(\text{SR})_{10}\text{S}_4^-$  and  $\text{Au}_{19}(\text{SR})_{12}^-$ , respectively, showing a loss of 2 Au atoms and gain of 2 -CH<sub>2</sub>CH<sub>2</sub>Ph ligands. The  $\Delta m$  across band 2 is two times greater than that of band 1;  $\Delta m = -2\text{Au} (396) -2\text{S} (64) +2\text{R} (210) = -250$  amu. Band 3 has high and low mass species of  $\text{Au}_{21}(\text{SR})_8\text{S}_6^-$  and  $\text{Au}_{18}(\text{SR})_{11}^-$  giving  $\Delta m$  that is three times greater than that of band 1  $\Delta m = -3\text{Au} (591) -3\text{S} (96) +3\text{R} (315) = -372$  amu. Band 4 has high and low mass species of  $\text{Au}_{21}(\text{SR})_6\text{S}_7^-$  and  $\text{Au}_{17}(\text{SR})_{10}^-$  exhibiting  $\Delta m = -4\text{Au} (788) -3\text{S} (96) +4\text{R} (420) = -464$  amu. Band 5 has high and low mass species of  $\text{Au}_{21}(\text{SR})_4\text{S}_8^-$  and  $\text{Au}_{16}(\text{SR})_9\text{S}^-$  exhibiting  $\Delta m = -5\text{Au} (985) -2\text{S} (64) +5\text{R} (525) = -524$  amu. Band 6 contains high and low mass species of  $\text{Au}_{21}(\text{SR})_2\text{S}_9^-$  and  $\text{Au}_{15}(\text{SR})_8\text{S}^-$  exhibiting  $\Delta m = -6\text{Au} (1182) -2\text{S} (64) +6\text{R} (630) = -616$  amu. Bands 7 and 8 do not contain a  $\text{Au}_{21}(\text{SR})_n\text{S}_m^-$  species, but band 7 contains a low mass species  $\text{Au}_{14}(\text{SR})_m\text{S}_n^-$ , representing the loss of 7 Au, and band 8 contains the low mass species  $\text{Au}_{13}(\text{SR})_m\text{S}_m^-$ , representing the loss of 8 Au. The  $\text{Au}_{13}(\text{SR})_m\text{S}_n^-$  species has now lost all the Au atoms from the outer protecting “staple” shell and contains only Au atoms that are in the Au<sub>13</sub> core with a combination of stabilizing S and SR units.

Figure S5: Schematic of the Synapt HDMS design accessible at [www.waters.com](http://www.waters.com)

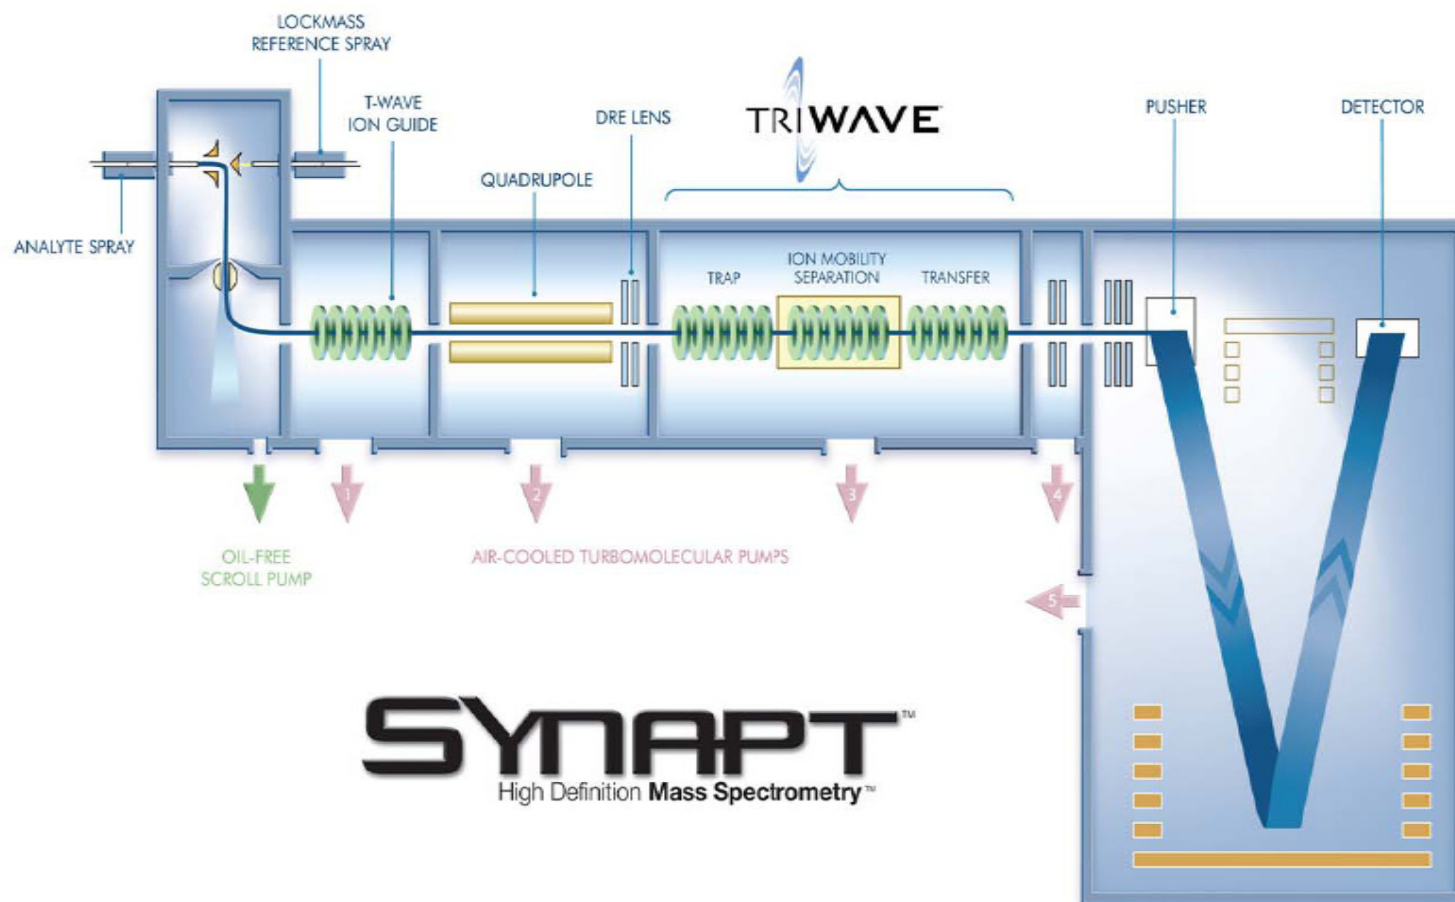

Supplement: Supplementary file 1 [file 4417654]
